# Supplementary material
Source: publisher figshare collection journal article supplement (https://diabetesjournals.figshare.com/ndownloader/files/24848567)
Supplement: Supplementary file 1 [file 24848567]

**Suppl table 1: Associations between presence of diabetes and plasma glucose levels with plasma methylglyoxal, free AGE and D-lactate levels**

|          | Model | MGO                        | Free CML                   | Free CEL                   | Free MG-H1            | D-lactate                   |
|----------|-------|----------------------------|----------------------------|----------------------------|-----------------------|-----------------------------|
| Diabetes | 1     | 0.27 (-0.05 to 0.60)       | 0.29 (-0.02 to 0.59)       | <b>0.41 (0.11 to 0.71)</b> | 0.21 (-0.10 to 0.52)  | <b>0.72 (0.41 to 1.02)</b>  |
|          | 2     | 0.14 (-0.19 to 0.47)       | 0.15 (-0.06 to 0.37)       | <b>0.25 (0.05 to 0.46)</b> | -0.04 (-0.31 to 0.23) | <b>0.68 (0.33 to 1.02)</b>  |
| Glucose  | 1     | 0.12 (-0.04 to 0.28)       | 0.06 (-0.09 to 0.21)       | 0.08 (-0.07 to 0.23)       | 0.06 (-0.10 to 0.21)  | <b>0.20 (0.05 to 0.036)</b> |
|          | 2     | <b>0.16 (0.02 to 0.30)</b> | <b>0.11 (0.01 to 0.20)</b> | <b>0.13 (0.04 to 0.22)</b> | 0.08 (-0.04 to 0.20)  | <b>0.18 (0.03 to 0.33)</b>  |

Methylglyoxal (MGO), N<sup>ε</sup>-(carboxymethyl)lysine (CML), N<sup>ε</sup>- (carboxyethyl)lysine (CEL), 5-hydro-5-methylimidazolone (MG-H1). All data were analysed with linear regression. Betas are presented per standard deviation increase in plasma glucose independent variable per standard deviation increase of the outcome variables. All continuous outcome variables were Ln transformed. Model 1 is adjusted for sex, age and trial arm. Model 2 is further adjusted for BMI, smoking, eGFR, plasma cholesterol and systolic blood pressure.
